# Supplementary material for: Bayesian Networks and Causal Inference for the Interpretation of Patients' Symptom Experience
Source: Research Square preprint supplement (doi:10.21203/rs.3.rs-491010/v1), 2021-05-06
Supplement: Supplementary file 1 [file 55dae7d91a6ed9492dc7fc56.pdf]

# Bayesian Networks and Causal Inference for the Interpretation of Patients' Symptom Experience

## Supplemental Tables S1-S2

**Table S1.** Demographic and Clinical Characteristics of the Sample (n=1328)

| Characteristic                                                           | Mean (SD)    |
|--------------------------------------------------------------------------|--------------|
| Age (years)                                                              | 57.3 (12.3)  |
| Education (years)                                                        | 16.2 (3.0)   |
| Body mass index (kg/m <sup>2</sup> )                                     | 26.2 (5.7)   |
| Karnofsky Performance Status score                                       | 80.1 (12.4)  |
| Self-administered Comorbidity Questionnaire score                        | 5.5 (3.2)    |
| Time since diagnosis (years)                                             | 2.0 (3.9)    |
| Time since diagnosis (years, median)                                     | 0.4          |
| Number of prior cancer treatments                                        | 1.6 (1.5)    |
| Number of metastatic sites including lymph node involvement <sup>a</sup> | 1.2 (1.2)    |
| Number of metastatic sites excluding lymph node involvement              | 0.8 (1.0)    |
| Average number of symptoms reported prior to their next dose of CTX      | 13.9 (7.2)   |
|                                                                          | <b>% (n)</b> |
| Gender (% female)                                                        | 77.8 (1033)  |
| Self-reported ethnicity                                                  |              |
| White                                                                    | 69.9 (916)   |
| Non-white                                                                | 30.1 (412)   |
| Married or partnered (% yes)                                             | 64.4 (843)   |
| Lives alone (% yes)                                                      | 21.5 (282)   |
| Currently employed (% yes)                                               | 35.2 (462)   |
| Annual household income                                                  |              |
| Less than \$30,000                                                       | 18.4 (219)   |
| \$30,000 to \$70,000                                                     | 21.2 (252)   |
| \$70,000 to \$100,000                                                    | 16.7 (198)   |
| Greater than \$100,000                                                   | 43.7 (520)   |
| Child care responsibilities (% yes)                                      | 22.0 (286)   |
| Elder care responsibilities (% yes)                                      | 7.9 (95)     |
| Exercise on a regular basis (% yes)                                      | 71.0 (922)   |
| Cancer diagnosis                                                         |              |
| Breast cancer                                                            | 40.2 (534)   |
| Gastrointestinal cancer                                                  | 30.6 (407)   |
| Gynecological cancer                                                     | 17.5 (232)   |
| Lung cancer                                                              | 11.7 (155)   |
| Prior cancer treatment                                                   |              |
| No prior treatment                                                       | 25.0 (323)   |
| Only surgery, CTX, or RT                                                 | 42.0 (542)   |
| Surgery and CTX, or surgery and RT, or CTX and RT                        | 19.9 (257)   |
| Surgery and CTX and RT                                                   | 13.1 (169)   |
| Metastatic sites                                                         |              |
| No metastasis                                                            | 32.3 (423)   |

Continued on next page

**Table S1 – continued from previous page**

|                                                   | % (n)      |
|---------------------------------------------------|------------|
| Only lymph node metastasis                        | 22.1 (289) |
| Only metastatic disease in other sites            | 21.1 (277) |
| Metastatic disease in lymph nodes and other sites | 24.5 (321) |
| Cycle length                                      |            |
| 14 day cycle                                      | 42.1 (558) |
| 21 day cycle                                      | 50.5 (670) |
| 28 day cycle                                      | 7.3 (97)   |

<sup>a</sup> Total number of metastatic sites evaluated was 9.

Abbreviations: CTX = chemotherapy, kg = kilograms, m<sup>2</sup> = meters squared, RT = radiation therapy, SD = standard deviation

**Table S2.** Performance and Stability of Bayesian Network Algorithms

| Algorithm                                                       | Sample size | Threshold | k2        | BDE       | AIC       | BIC       | logik     | Arcs Number | Number of Common Arcs* | Hamming Distance* | Structural Hamming Distance* |
|-----------------------------------------------------------------|-------------|-----------|-----------|-----------|-----------|-----------|-----------|-------------|------------------------|-------------------|------------------------------|
| GS                                                              | 332         | 0.8500    | -29818.64 | -29818.74 | -29718.37 | -29677.37 | -29824.81 | 3           | 3                      | 7                 | 8                            |
|                                                                 | 332         | 0.4930    | -29237.59 | -29239.17 | -29125.53 | -29247.55 | -29078.53 | 8           | 5                      | 16                | 18                           |
|                                                                 | 664         | 0.8500    | -29541.37 | -29541.20 | -29436.34 | -29550.57 | -29392.34 | 5           | 5                      | 5                 | 5                            |
|                                                                 | 664         | 0.4903    | -29131.40 | -29134.36 | -29012.75 | -29147.75 | -28960.75 | 12          | 10                     | 12                | 17                           |
|                                                                 | 996         | 0.8500    | -29471.19 | -29470.84 | -29362.68 | -29482.1  | -29316.68 | 7           | 7                      | 3                 | 4                            |
|                                                                 | 996         | 0.4906    | -29104.73 | -29110.37 | -28971.68 | -29143.02 | -28905.68 | 17          | 13                     | 11                | 13                           |
|                                                                 | 1328        | 0.8500    | -29451.03 | -29462.67 | -29331.35 | -29487.11 | -29271.35 | 10          | 10                     | 0                 | 0                            |
|                                                                 | 1328        | 0.4985    | -29130.00 | -29179.53 | -28975.69 | -29240.49 | -28873.69 | 22          | 22                     | 1                 | 1                            |
|                                                                 | 1328**      | 0.8500    | -29451.03 | -29462.67 | -29331.35 | -29487.11 | -29271.35 | 10          | -                      | -                 | -                            |
|                                                                 | 1328**      | 0.4963    | -29130.00 | -29179.53 | -28975.69 | -29240.49 | -28873.69 | 22          | -                      | -                 | -                            |
| HC                                                              | 332         | 0.8500    | -28722.65 | -28726.57 | -28603.20 | -28735.61 | -28552.20 | 13          | 9                      | 16                | 20                           |
|                                                                 | 332         | 0.4987    | -27999.91 | -28003.56 | -27853.40 | -28027.34 | -27786.40 | 25          | 21                     | 34                | 52                           |
|                                                                 | 664         | 0.8500    | -28492.51 | -28495.74 | -28360.98 | -28511.55 | -28302.98 | 18          | 14                     | 11                | 14                           |
|                                                                 | 664         | 0.4878    | -27612.57 | -27619.04 | -27429.49 | -27676.12 | -27334.49 | 42          | 35                     | 18                | 44                           |
|                                                                 | 996         | 0.8500    | -28177.69 | -28179.24 | -28033.37 | -28202.12 | -27968.37 | 24          | 21                     | 5                 | 11                           |
|                                                                 | 996         | 0.5000    | -27446.14 | -27449.48 | -27246.63 | -27519.22 | -27141.63 | 49          | 43                     | 11                | 44                           |
|                                                                 | 1328        | 0.8500    | -28060.89 | -28061.89 | -27904.77 | -28094.28 | -27831.77 | 29          | 29                     | 0                 | 0                            |
|                                                                 | 1328        | 0.5034    | -27197.85 | -27202.55 | -26967.37 | -27310.05 | -26835.37 | 60          | 57                     | 0                 | 3                            |
|                                                                 | 1328**      | 0.8500    | -28060.89 | -28061.89 | -27904.77 | -28094.28 | -27831.77 | 29          | -                      | -                 | -                            |
|                                                                 | 1328**      | 0.4989    | -27164.21 | -27165.58 | -26932.69 | -27270.18 | -26802.69 | 59          | -                      | -                 | -                            |
| MMHC                                                            | 332         | 0.8500    | -28722.65 | -28726.57 | -28603.20 | -28735.61 | -28552.20 | 13          | 10                     | 16                | 20                           |
|                                                                 | 332         | 0.4984    | -27940.17 | -27943.85 | -27791.88 | -27968.42 | -27723.88 | 26          | 22                     | 36                | 55                           |
|                                                                 | 664         | 0.8500    | -28533.85 | -28535.16 | -28400.16 | -28553.33 | -28341.16 | 18          | 16                     | 11                | 12                           |
|                                                                 | 664         | 0.5092    | -27603.43 | -27607.41 | -27419.52 | -27660.96 | -27326.52 | 42          | 38                     | 21                | 52                           |
|                                                                 | 996         | 0.8500    | -28177.75 | -28179.24 | -28033.37 | -28202.12 | -27968.37 | 24          | 23                     | 5                 | 11                           |
|                                                                 | 996         | 0.4951    | -27461.06 | -27470.1  | -27256.78 | -27550.14 | -27143.78 | 50          | 48                     | 13                | 25                           |
|                                                                 | 1328        | 0.8500    | -28060.88 | -28061.89 | -27904.77 | -28094.28 | -27831.77 | 29          | 29                     | 0                 | 0                            |
|                                                                 | 1328        | 0.4992    | -27206.61 | -27219.05 | -26966.79 | -27343.22 | -26821.79 | 62          | 62                     | 1                 | 1                            |
|                                                                 | 1328**      | 0.8500    | -28060.88 | -28061.89 | -27904.77 | -28094.28 | -27831.77 | 29          | -                      | -                 | -                            |
|                                                                 | 1328**      | 0.5010    | -27206.61 | -27219.05 | -26966.79 | -27343.22 | -26821.79 | 62          | -                      | -                 | -                            |
| *between the subsample and the complete, non-randomised dataset |             |           |           |           |           |           |           |             |                        |                   |                              |
| **complete, non-randomised dataset                              |             |           |           |           |           |           |           |             |                        |                   |                              |

**Abbreviations in Table S2 stand for the following:** GS = Grow-Shrink algorithm, HC = Hill Climbing algorithm, MMHC = Max-Min Hill Climbing algorithm. Better scores have green shading. Worst scores have red shading.

## Supplemental Figures S1-S6

**The 38 cancer symptoms represented in the graphs below are coded in the following fashion:** difcon: Difficulty Concentrating, pain: Pain, energy: Lack of Energy, cough: Cough, nervous: Feeling Nervous, hotflash: Hot Flashes, drymouth: Dry Mouth, nausea: Nausea, drowsy: Feeling Drowsy, numb: Numbness or Tingling in Hands or Feet, chest: Chest Tightness, difbreath: Difficulty Breathing, difsleep: Difficulty Sleeping, bloat: Feeling Bloating, urinate: Problems with Urination, vomit: Vomiting, sob: Shortness of Breath, diarrhea: Diarrhea, sad: Feeling Sad, sweats: Sweats, sexual: Problems with Sexual Interest or Activity, worry: Worrying, itch: Itching, appetite: Lack of Appetite, abdominal: Abdominal Cramps, increaseapp: Increased Appetite, wtgain: Weight Gain, dizzy: Dizziness, swallow: Difficulty Swallowing, irritable: Feeling Irritable, mouthsores: Mouth Sore, wtloss: Weight Loss, hairloss: Hair Loss, constipate: Constipation, swelling: Swelling, taste: Change in the Way Food Tastes, myself: I Do Not Look Like Myself, skin: Changes in Skin.

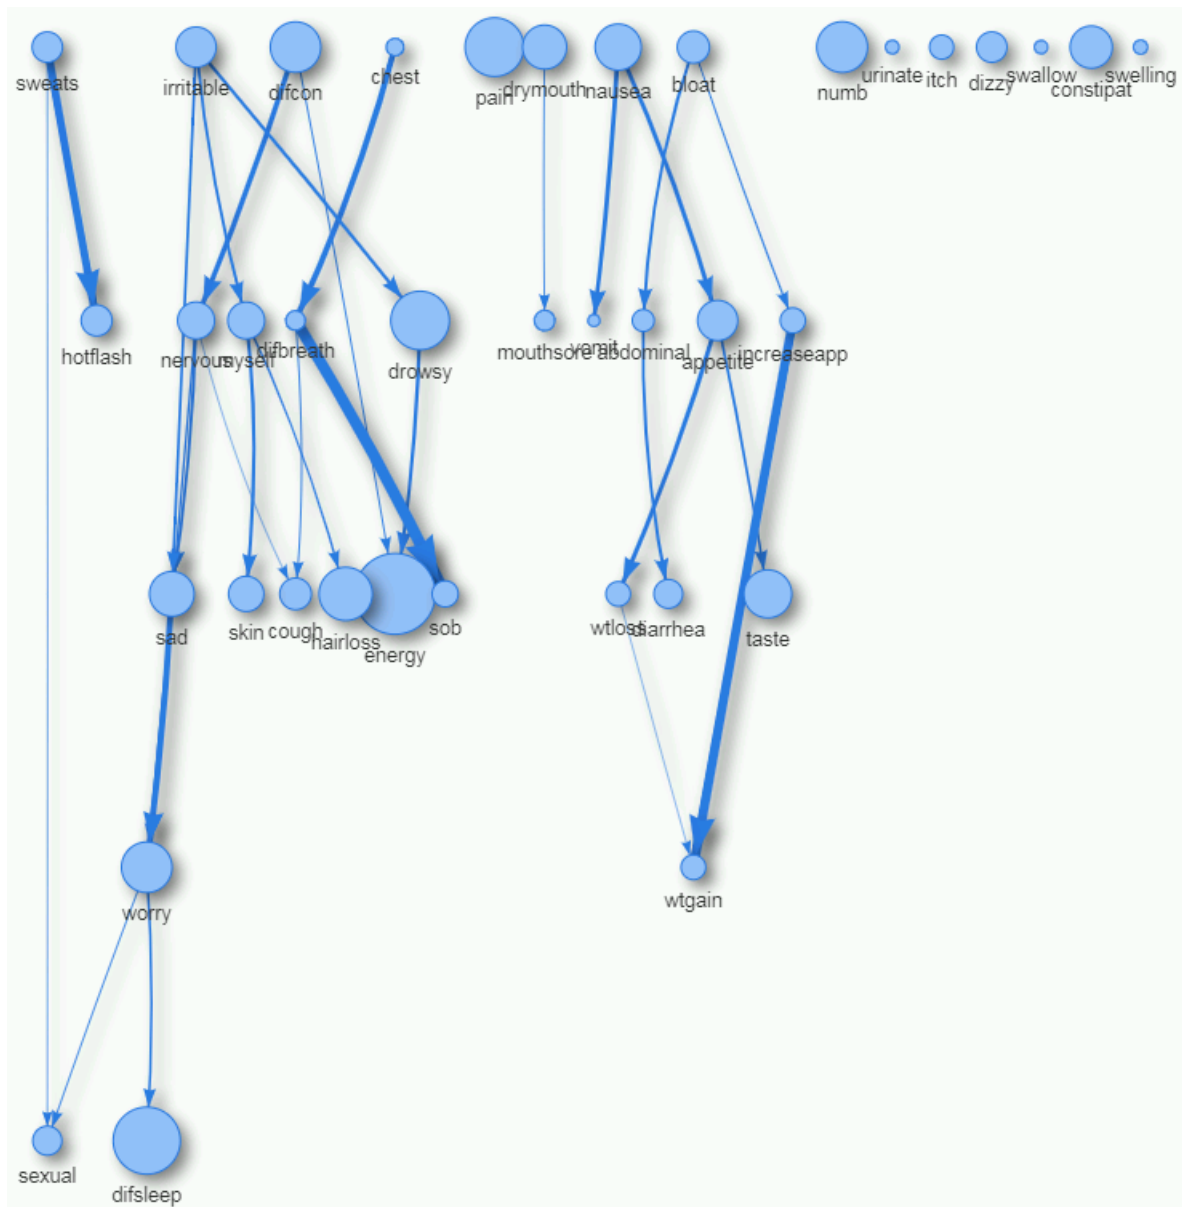

**Figure S1.** Network on symptom data for all the cancer patients (n=1328), made with the Max-Min Hill Climbing algorithm and 0.85 threshold (Sachs et al., 2005). To view the interactive diagram of this network see Online Figure 10<sup>1</sup>

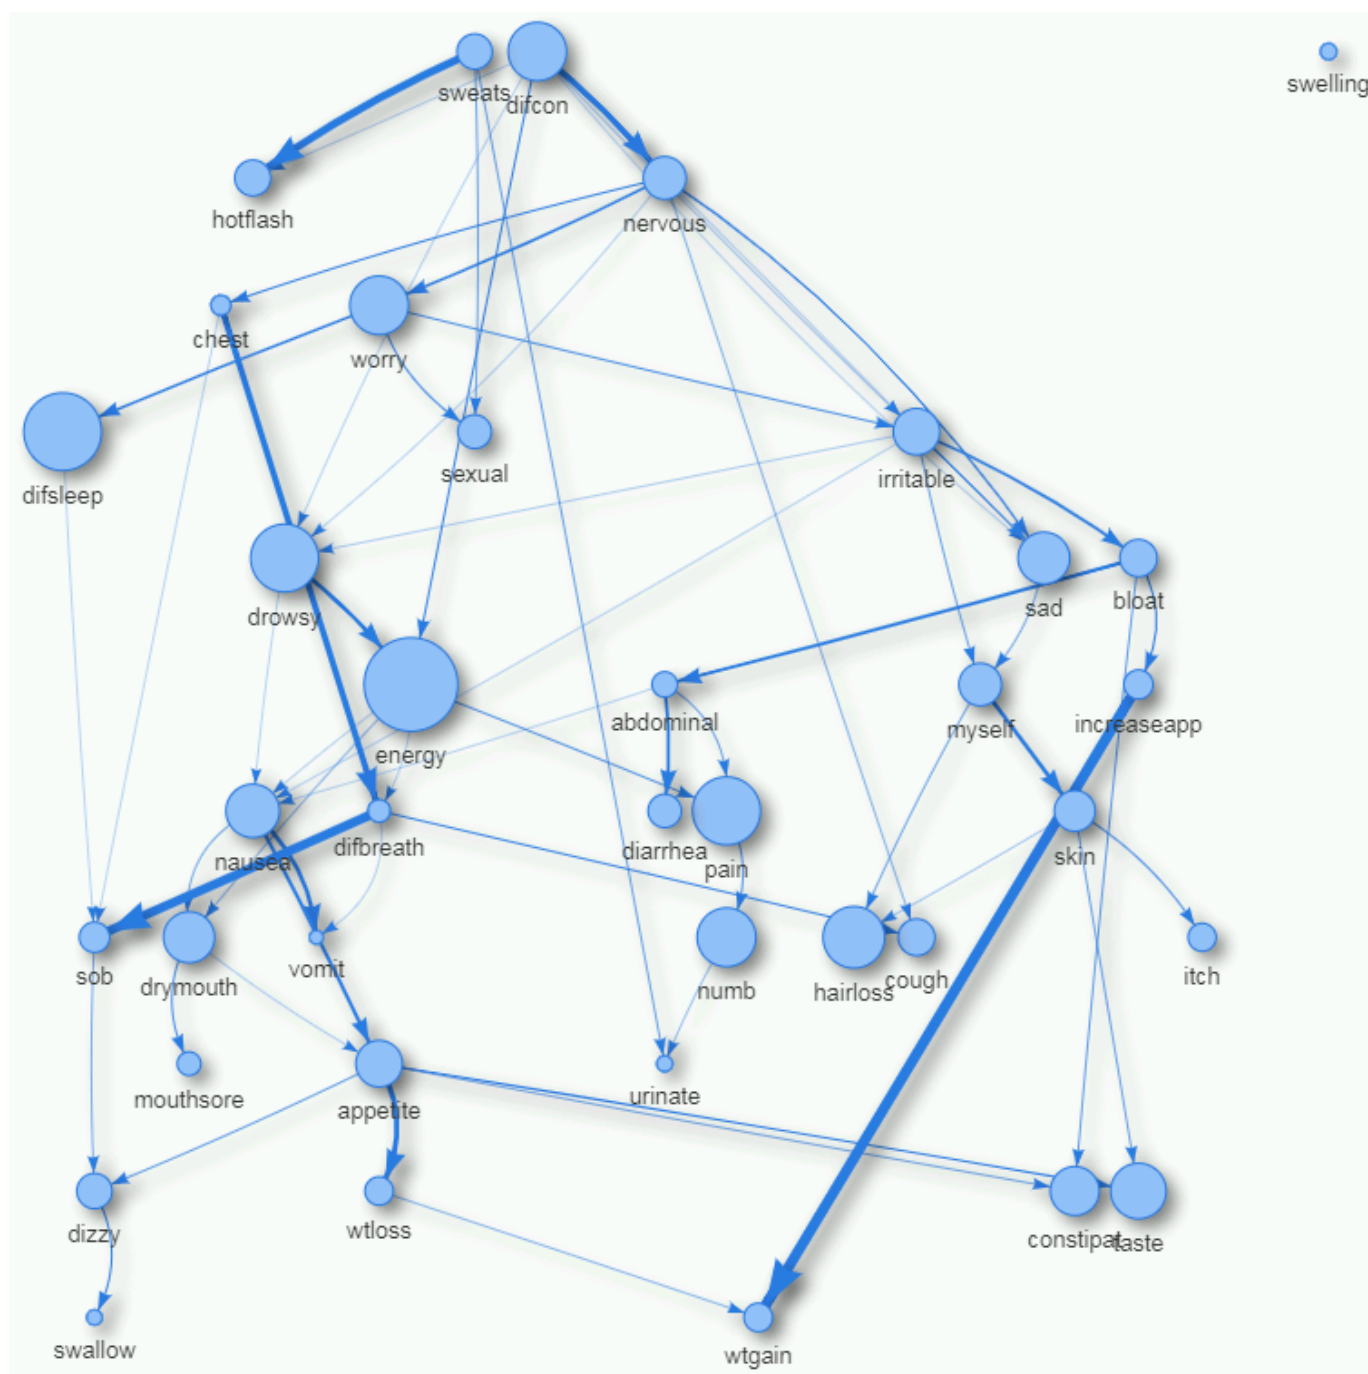

**Figure S2.** Network on symptom data for all the cancer patients (n=1328), made with the Max-Min Hill Climbing algorithm and optimal threshold according to Scurati Nagarajan, 2013. To view the interactive diagram of this network see Online Figure 11<sup>1</sup>

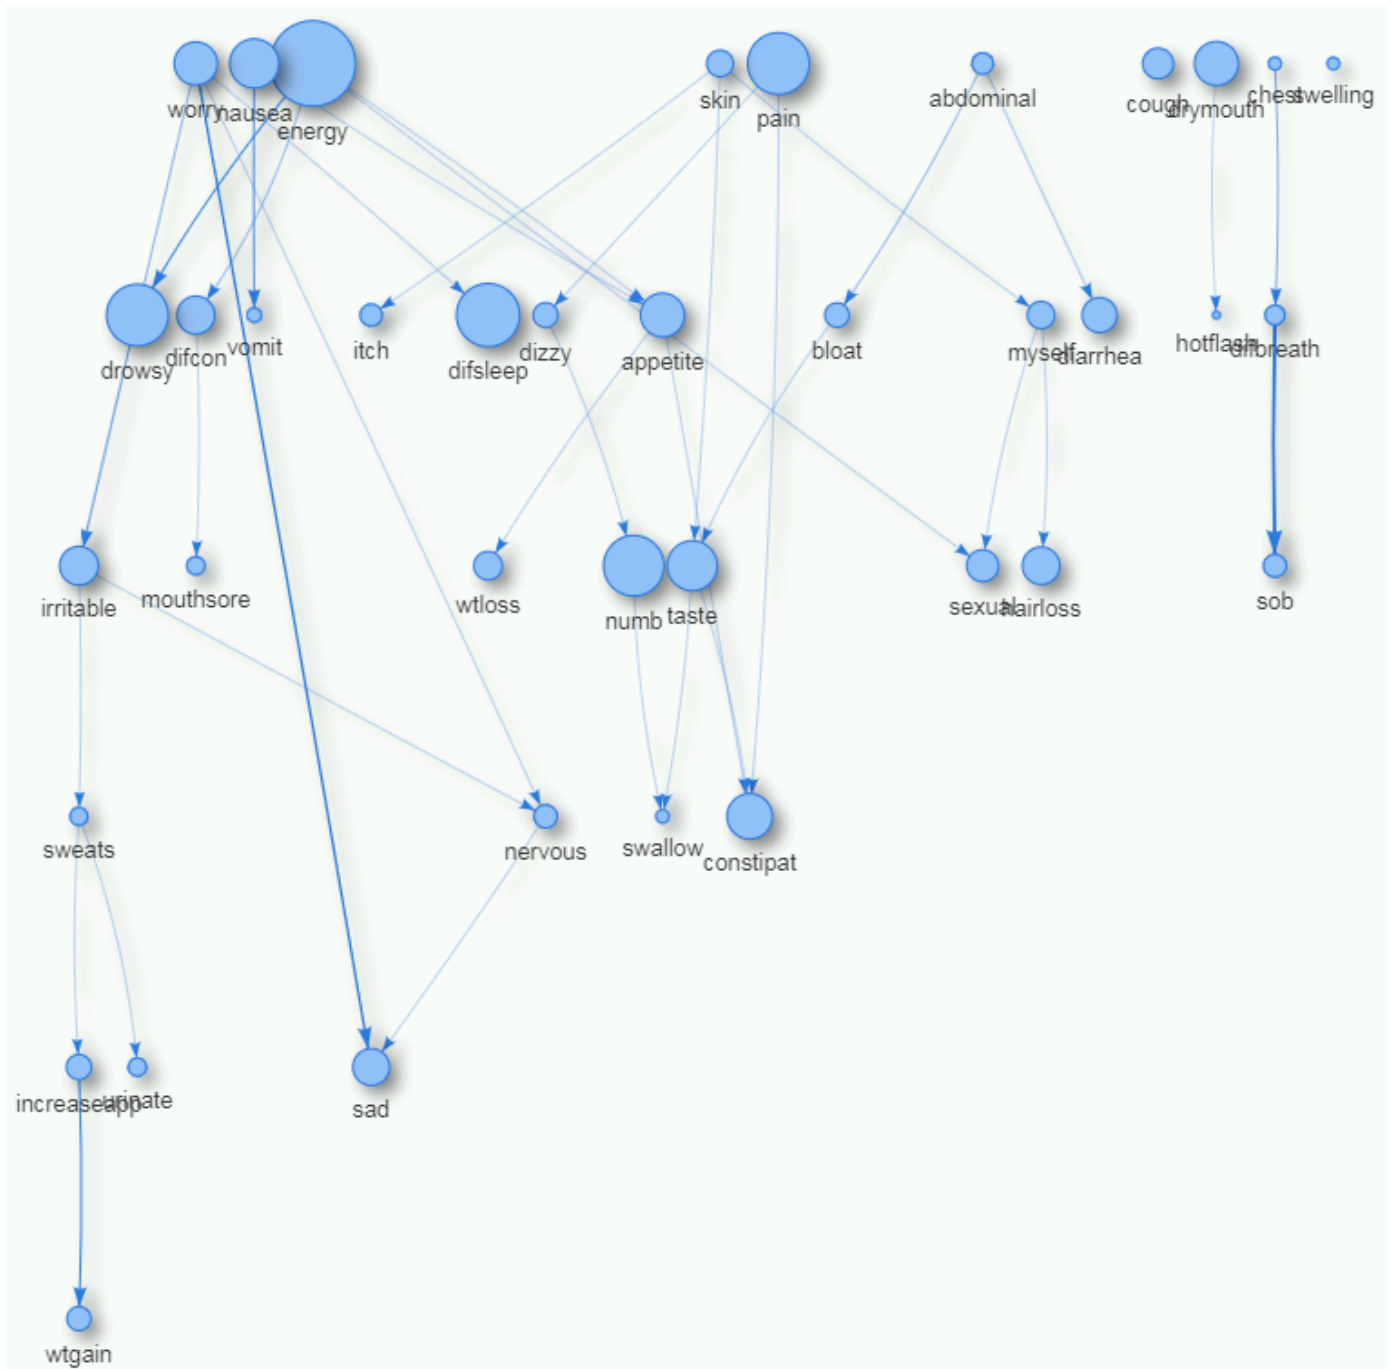

**Figure S3.** Network on symptom data for the male cancer patients (n=295), made with the Max-Min Hill Climbing algorithm and the optimal threshold according to Scurati Nagarajan, 2013. To view the interactive diagram of this network see Online Figure 19<sup>1</sup>

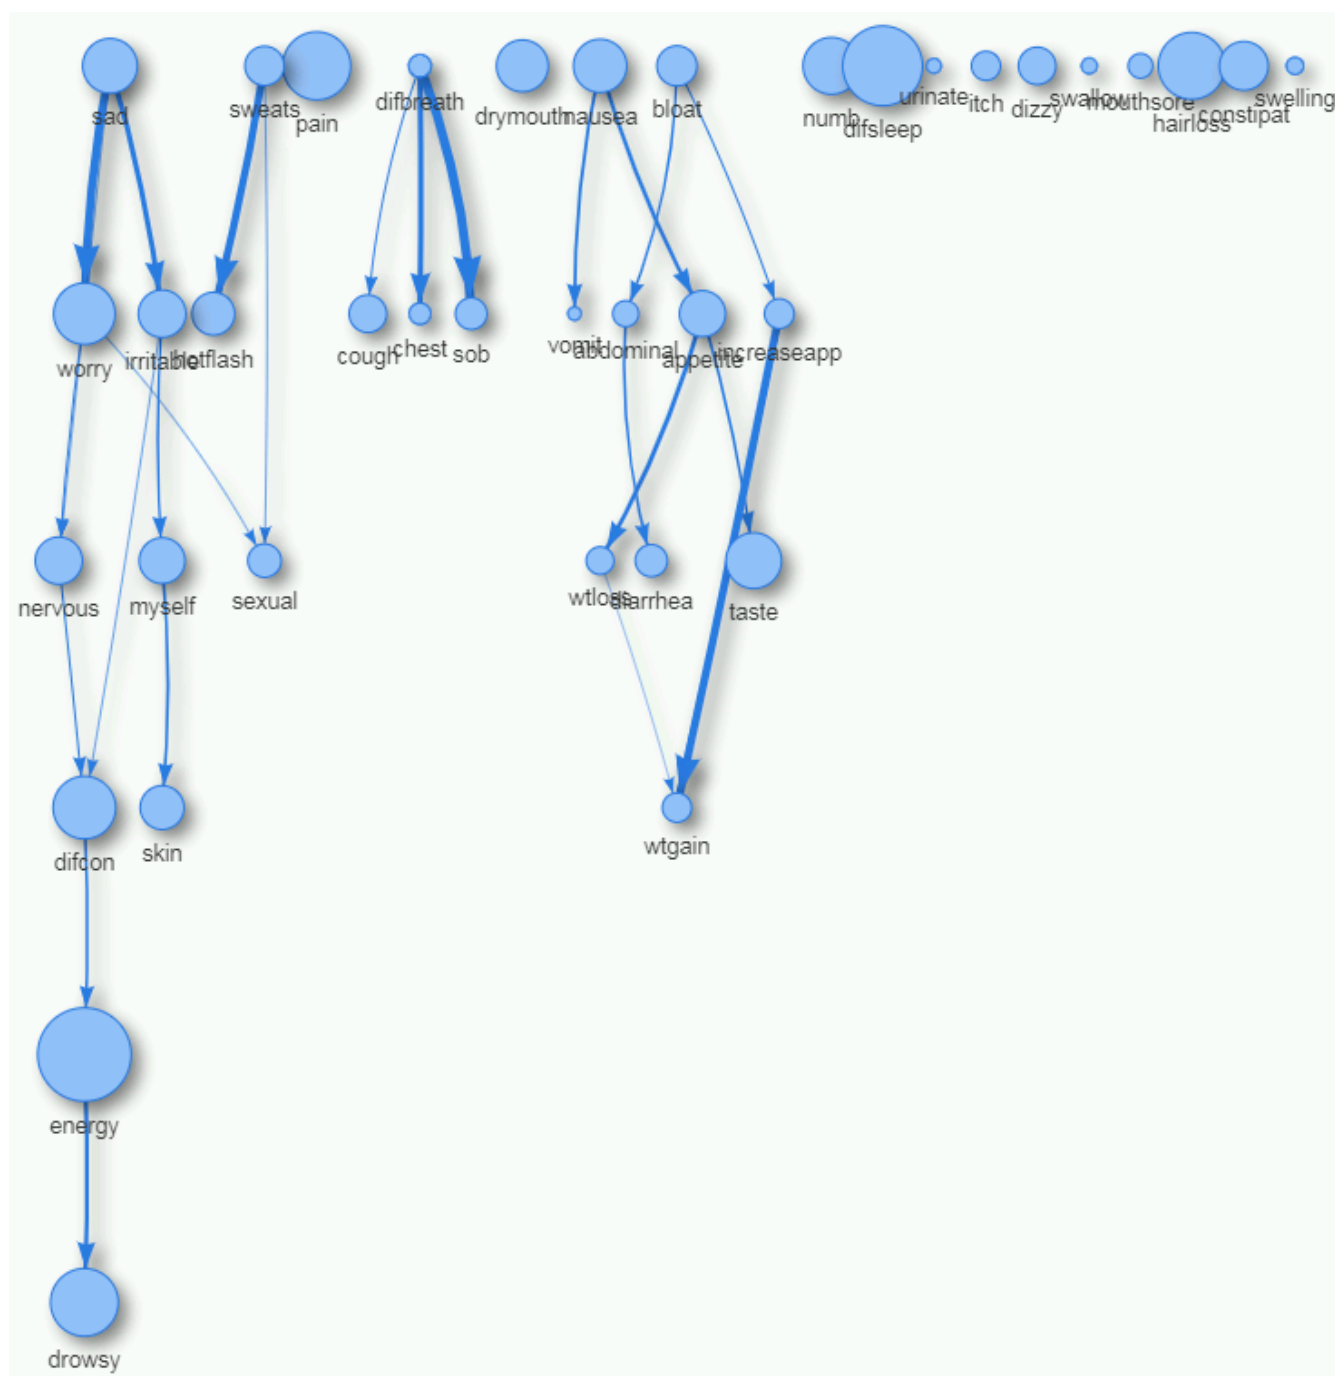

**Figure S4.** Network on symptom data for the female cancer patients (n=295, bootstrapped sampling), made with the Max-Min Hill Climbing algorithm and the optimal threshold according to Scurati Nagarajan, 2013. To view the interactive diagram of this network see Online Figure 23<sup>1</sup>

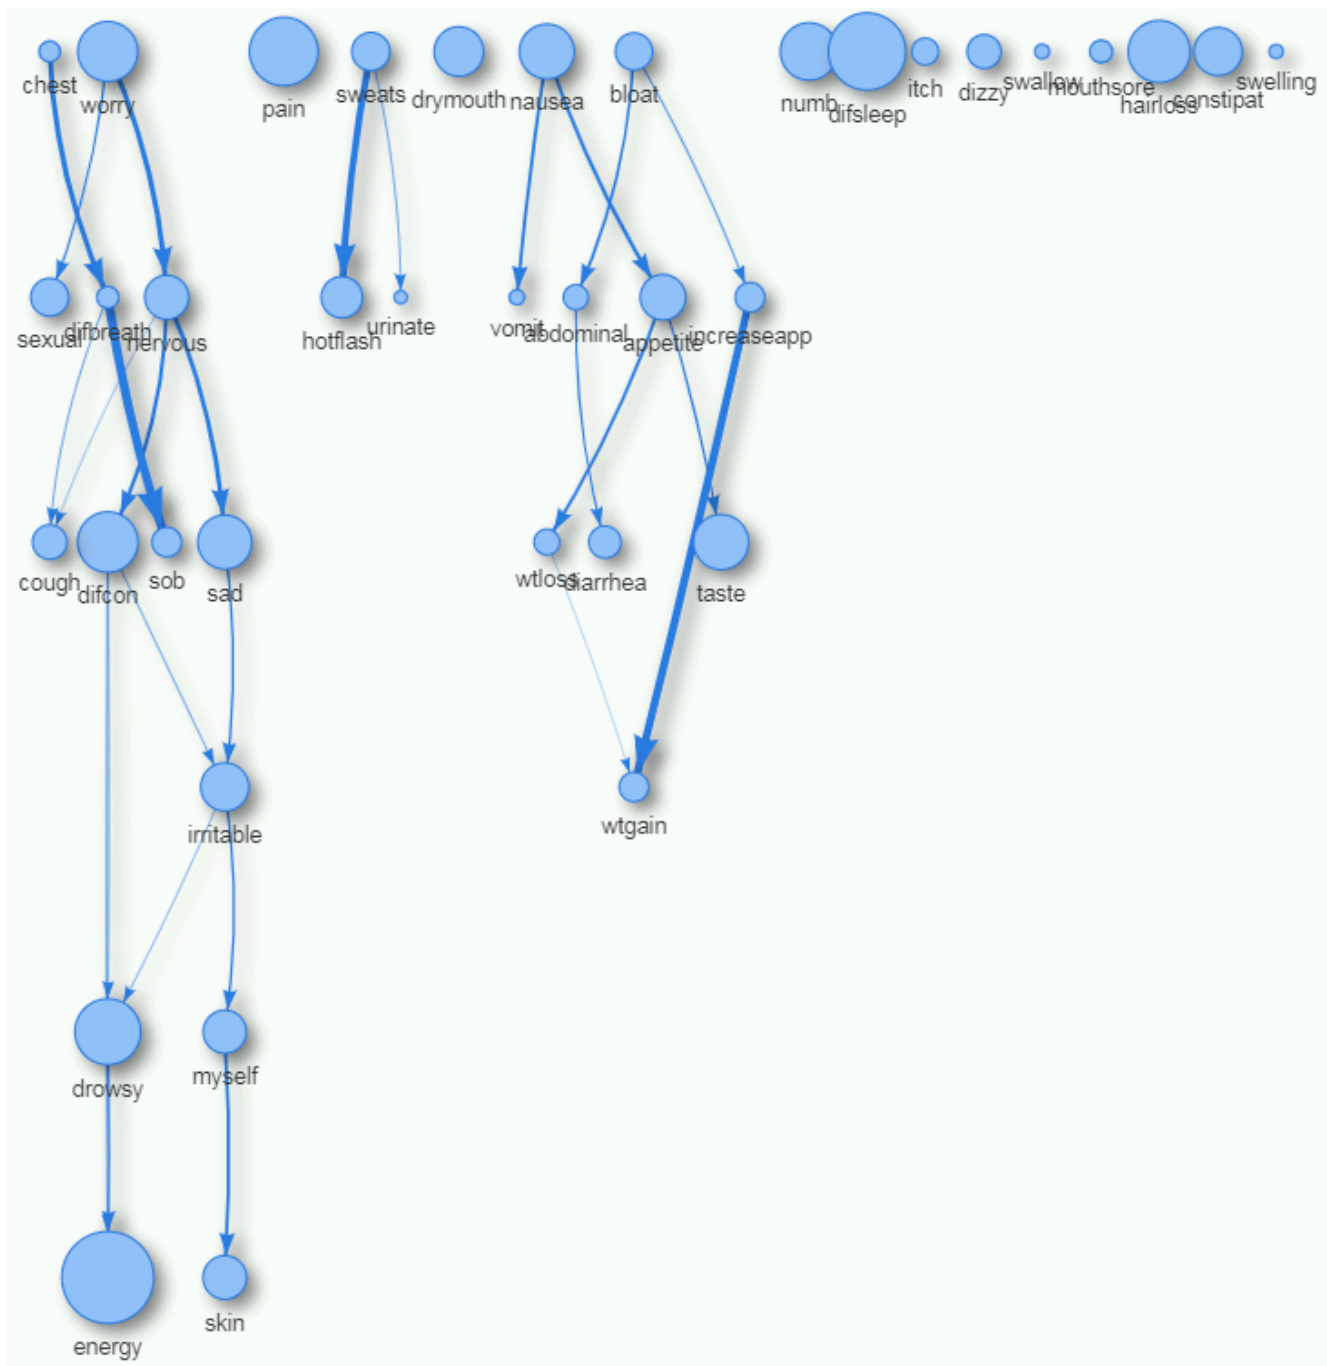

**Figure S5.** Network on symptom data for the cancer patients with age below 65 (n=370, bootstrapped sampling), made with the Max-Min Hill Climbing algorithm and the optimal threshold according to Scurati Nagarajan, 2013. To view the interactive diagram of this network see Online Figure 33<sup>1</sup>



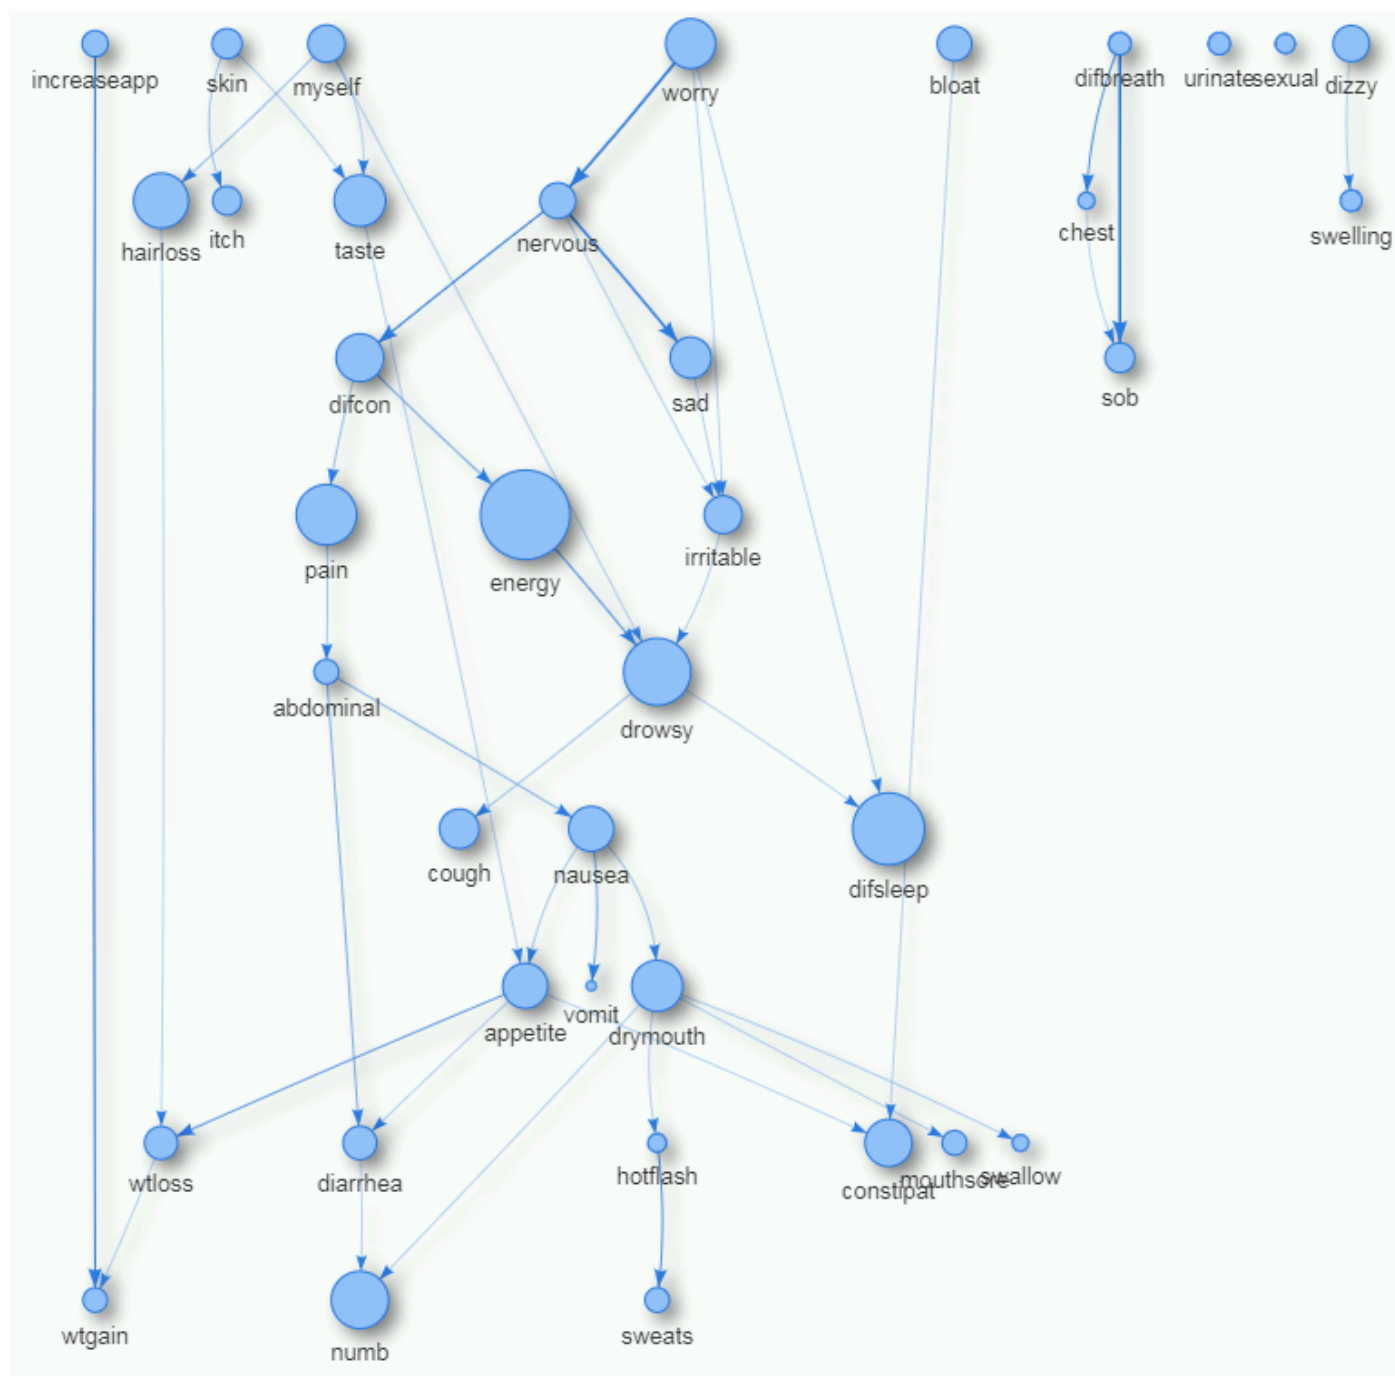

## References

1. Papachristou, N., Barnaghi, P., Allison, S. J., Kober, K. M. & Miaskowski, C. Online Figures of the paper titled Bayesian Networks and Causal Inference for the Interpretation of Patients' Symptom Experience. (2020). URL <https://doi.org/10.5281/zenodo.4001527>. DOI 10.5281/zenodo.4001527.
